1 ***Gene expression is stronger associated with behaviour than***  
2 ***with age and fertility in ant workers***

3 Philip Kohlmeier<sup>1</sup>, Austin R Alleman<sup>1</sup>, Romain Libbrecht<sup>1</sup>, Susanne Foitzik<sup>1\*</sup>, Barbara  
4 Feldmeyer<sup>2\*</sup>

5

6 *\* Authors contributed equally*

7 <sup>1</sup>*Department of Evolutionary Biology, Johannes Gutenberg University Mainz, Johannes von*  
8 *Müller Weg 6, Mainz 55128, Germany*

9 <sup>2</sup>*Senckenberg Biodiversity and Climate Research Centre, Senckenberg Gesellschaft für*  
10 *Naturforschung, Senckenberganlage 25, D-60325 Frankfurt am Main, Germany*

11

12 **Corresponding author:** Philip Kohlmeier email: [philip.kohlmeier@gmail.com](mailto:philip.kohlmeier@gmail.com)

13

14

15

16

17

18

19 *Abstract*

20 The ecological success of social insects is based on division of labour, not only between queens  
21 and workers, but also among workers. Whether a worker tends the brood or forages is strongly  
22 influenced by age, fertility and nutritional status, with brood carers being younger, more fecund  
23 and corpulent. Here, we experimentally disentangle behaviour from age and fertility  
24 in *Temnothorax longispinosus* ant workers and analyse how these parameters are linked to  
25 whole-body gene expression. Our transcriptome analysis reveals four times more genes  
26 associated with behaviour than with age and only few fertility-associated genes. Brood carers  
27 exhibited an upregulation of genes involved in lipid biosynthesis, whereas foragers invested in  
28 metabolism. Additional simulations revealed that the experimental disassociation of co-varying  
29 factors reduces transcriptomic noise, potentially explaining discrepancies between  
30 transcriptomic studies on worker behaviour in other social insects. Our study highlights the  
31 influence of nutritional status on task choice in ant workers.

32

33

34

35

36

## 37 **Introduction**

38 Division of labour can be found on all levels of biological organization and has arisen  
39 independently during several of the major transitions in evolution, for example during the  
40 transition from single cell to multicellular organisms or from solitary to social life [1]. The  
41 primary driver for the repeated evolution of division of labour is that it allows cells or group  
42 members to specialize on few tasks, thus increase in efficiency and allowing for anatomic or  
43 physiological adaptations [2–5].

44         The mechanistic underpinnings regulating specialization are complex and intensively  
45 investigated on different levels of biological organisation. A highly developed example of  
46 division of labour is found in the societies of ants, bees, wasps and termites. In these colonies  
47 of social insects, reproduction is monopolized by a single or very few individuals, the queens  
48 (and kings in termites), whereas the majority of the colony members – the workers - remain  
49 functionally sterile. All other colony chores are distributed among the workers, which specialize  
50 on specific tasks such as brood care, nest defence and foraging [3].

51         Whether a worker stays inside the nest and cares for the brood or leaves the nest and  
52 forages is strongly influenced by age and physiology with brood carers being younger [3], more  
53 corpulent [6–14] and more fertile [15,16] than foragers. Due to high external mortality outside  
54 the nest [17], this age- and physiology-based non-reproductive division of labour is beneficial,  
55 because it ensures that young workers with longest residual life span, the largest amount of  
56 stored resources and the highest reproductive potential stay inside the safety of the nest.

57         Although age and physiology are important regulators of worker task choice in many  
58 social insects, few common mechanisms linking age and physiology to behaviour have been  
59 found. For example, the switch from brood care to foraging is at least partly regulated by an  
60 interaction between age and stable lipid loss [6–14,18,19]. Information on the nutritional status  
61 are transported to and in the brain via Target of rapamycin (TOR) and Insulin/Insulin-like  
62 signalling (IIS) pathways [12,20–23]. However, transcriptomic patterns and expression biases

63 of multiple behaviour-associated genes seem to be lineage-specific, despite crosstalk with the  
64 highly conserved TOR and IIS pathways. Task-specific signatures of nutritional status and  
65 metabolism characterize the brood carer- and forager-specific transcriptomes in bees and wasps  
66 [18,22,24–29], but such evidence is lacking in ants [30,31]. Brood caring behaviour in honey  
67 bees is associated with low titres of juvenile hormone (JH) and high expression of the gene  
68 coding for the yolk protein precursor *Vitellogenin* (*Vg*). Once JH titres rise, *Vg* is downregulated  
69 resulting in a reduction in brood care, a forager-like gene expression, alterations in small RNA  
70 populations, a mobilization of carbohydrates and precocious foraging [26,32–37]. In other  
71 social insects, this linkage between JH, *Vg* and behaviour is similar [23,38–40], absent [41] or  
72 reversed [42–44]. Moreover, *Vg* underwent multiple duplications in ants with different  
73 orthologs taking over specific functions in the regulation of fertility and behaviour [31,45–49].  
74 In honey bees, the *foraging* gene is highly expressed in the optical lobes and mushroom bodies  
75 of forager’ brains [50,51], causing an elevated sucrose responsiveness and the onset of foraging  
76 behaviour [52,53]. The expression of *foraging* in other social insects is either positively [54–  
77 56] or negatively [57–59] linked to foraging behaviour and additionally influenced by age [60],  
78 social structure [30], body size [54,58] and time of the day [61]. The manganese transporter  
79 *malvolio* is upregulated in foragers, which induces precocious foraging behaviour by increasing  
80 sucrose responsiveness in honey bees [62]. Similar to *Vg*, *malvolio* underwent duplication and  
81 subfunctionalization in multiple social and subsocial insects, which raises the question as to  
82 whether the role of *malvolio* in honey bees can be extended to other insects [63]. The  
83 neuromodulators tyramine and its precursor octopamine promote the onset of foraging, are  
84 involved into the rewarding system in honey bee foragers and increase gustatory responsiveness  
85 [28,64–66], but their role in other species is unknown.

86 This across-species inconsistency regarding the mechanistic underpinnings of worker  
87 task choice may reflect lineage-specific mechanisms regulating behaviour or differences across  
88 studies in the experimental design. Gene expression patterns associated with worker behaviour

89 are typically identified by comparing gene expression of brood carers and foragers. As age and  
90 fertility additionally influence gene expression [22,28,67,68], studies that did not  
91 experimentally control for age and physiology when comparing gene expression between brood  
92 carers and foragers [e.g. 28,31,46,56,57,69–73] might have produced results driven not only by  
93 behaviour, but also by age and fertility. Such confounded transcriptomic analyses are not a  
94 problem specific to research on insect behaviour but occur across study systems and contexts.  
95 For instance, the degree of tissue heterogeneity, i.e. different numbers of cell types present in a  
96 tissue, potentially confounds studies comparing gene expression of different tissues [73]. Thus,  
97 confounding factors are an important and partly neglected problem when investigating the  
98 transcriptomic underpinnings and mechanisms of different traits in general and non-  
99 reproductive division of labour in particular.

100 In this study, we altered the age structure of colonies of the acorn ant *Temnothorax*  
101 *longispinosus* to experimentally create young and old brood carers and foragers respectively.  
102 Furthermore, we sampled both fertile and infertile individuals for each combination of  
103 behaviour and age. This allowed us to properly assess how behaviour, age, and fertility are  
104 associated with gene expression in ant workers. A recent study revealed stronger differences in  
105 gene expression between ant queens and workers [68] than between different age-cohorts of the  
106 same caste. As we sampled from two clearly distinct age-cohorts differing in age by at least one  
107 year, which is estimated to be the mean *T. longispinosus* worker lifespan in the field [74], we  
108 expected age to have a stronger impact on gene expression than behaviour. Furthermore, we  
109 expected a rather weak association with fertility as we analysed ant workers from queen-right  
110 colonies. Nevertheless, a first study on this species revealed differences between fertile and  
111 infertile workers [31].

112 In a second step, we used different subsets of our data to investigate the additional  
113 variance introduced to a dataset by not controlling experimentally for confounding factors like  
114 age. Transcriptome studies on worker behaviour coupled with such a manipulation have so far

115 been restricted to honey bees [67,75], where they provided great insights into the interaction  
116 between behaviour, age and gene expression.

117

## 118 **Material and methods**

### 119 *Sample collection and preparation*

120 We collected 38 monogynous colonies of the ant *T. longispinosus* with an average colony size  
121 of  $29 \pm 1.5$  (mean  $\pm$  sd) workers at the E.N. Huyck Preserve, Rensselaerville, NY, USA in June  
122 2014. Because of the synchronized annual brood emergence in this population around July and  
123 August, all field collected workers were at least one year old (termed “old”). *Temnothorax*  
124 queens are singly-mated which reduces the potential genetic effects on worker behaviour [76].  
125 In our laboratory in Mainz, Germany, the ant colonies were transferred to slide glass nests and  
126 kept in plastered 3-chambered nest-boxes (Figure S1). We maintained them at a 14h:10h  
127 light:dark photoperiod and a +22°C:+18°C temperature regime to facilitate brood development.  
128 Ants were fed with crickets and honey three times a week. We randomly marked either all  
129 young (upon eclosion in the lab) or all old (field collected) workers with thin metal wires  
130 (0.02mm, Elektrisola) in each colony, allowing us to differentiate between the two age cohorts.  
131 Disentangling the effects of behaviour and age on gene expression requires a full factorial  
132 design regarding behaviour (brood carer, forager) and age (young, old). To achieve this, we  
133 manipulated the demography of colonies 28 days after the emergence of a new worker  
134 generation (Figure 1). Specifically, we either removed (i) all old workers from the colony to  
135 induce foraging behaviour in young workers (n=12), (ii) removed all young workers to force  
136 old workers to tend the brood (n=10), or (iii) removed half of each age cohort as a control  
137 (n=16). Workers were then given 21 days to adjust their behaviour and social organisation. Six  
138 brood carers (observed tending the brood) and six foragers (found outside the nest) were then  
139 individually labelled with metal wire and their investment into either brood caring and foraging  
140 was observed and recorded ten times a day for three days. In *Temnothorax* ants, a single

141 observation is sufficient to classify workers into brood carers and foragers [77] (Kohlmeier et  
142 al. *subm.*). Behavioural observations revealed a clear age-polyethism with young workers  
143 focussing on brood care and older workers caring for the adult nestmates and taking over  
144 foraging (for details on the methods and results of the behavioural observations see Kohlmeier  
145 et al. *subm.*). After the completion of all observations, we dissected these workers on ice to  
146 assess their fertility (fertile: at least one oocyte in the ovaries; infertile: no eggs in development).  
147 Following this, individuals were homogenized in 100µl Trizol (Invitrogen) and frozen at -80°C  
148 until further processing.

149         Eight brood carers and eight foragers per demography treatment, i.e. a total of 48  
150 workers, were sampled for individual whole-body RNAseq analyses (Figure 1). Muscular  
151 activity and consequently behaviour are directly controlled by the brain. However, brain  
152 processes are influenced by hormonal activity, nutritional status or ovary development. To gain  
153 insights into such up-stream causative factors, we decided to investigate changes in gene  
154 expression within the entire worker ant. As *Temnothorax* workers are monomorphic, gene  
155 expression differences based on differences in morphology or anatomy are unlikely [78]. As  
156 we sampled both, fertile and infertile workers for each combination of behaviour and caste, we  
157 were able to investigate gene expression associated with behaviour, age and fertility  
158 independent from each other. After defrosting, 100µl Chloroform was added to each sample,  
159 after which samples were cautiously inverted for 30s and then centrifuged at 12,000rpm for 15  
160 min at +4°C. The resulting supernatant was collected, and RNA precipitated with 60µl 70%  
161 ethanol. Subsequent RNA extraction was conducted with the RNeasy Mini Kit (Qiagen),  
162 following the manufacture instructions. Libraries were constructed at GENterprise GmbH  
163 Mainz following the standard Illumina protocol, and each library was individually indexed. All  
164 48 libraries were pooled and sequenced with 100 bp paired-end equally spread across eight  
165 lanes of an Illumina HiSeq 2500 (Table S1). Sequences will be stored at NCBI short read  
166 archive.

167

168 *Gene expression analysis*

169 Quality analyses of raw reads were conducted with FastQC  
170 (<http://www.bioinformatics.babraham.ac.uk/projects/fastqc/>) and Illumina adapters were  
171 removed using Trimmomatic [79]. A *de novo* assembly of raw reads was built in two steps:  
172 Firstly, remaining raw reads were assembled using CLC Workbench v.7.0.3  
173 (<https://www.qiagenbioinformatics.com/>; Table S2) and a subsequent meta-assembly was  
174 performed in MIRA [80] using CLC Workbench contigs as input. We removed redundant  
175 and/or low-confidence contigs from the transcriptome using CD-Hit-Est v.4.6.1 [80].

176 For the gene expression analysis, reads were aligned to their corresponding contigs  
177 using TopHat v2.1.1 [81], in conjunction with Bowtie 2 v2.1.0 ([http://bowtie-](http://bowtie-bio.sourceforge.net/)  
178 [bio.sourceforge.net/](http://bio.math.berkeley.edu/eXpress/)). Read count information was obtained with eXpress v1.5.1  
179 (<http://bio.math.berkeley.edu/eXpress/>).

180 Gene expression analysis was performed using *edgeR* v3.6 [82] by running the  
181 following three different GLMs to identify genes associated with (i) *behaviour*: brood carers  
182 and foragers were compared whereas fertility and age were added as blocking factors, (ii) *age*:  
183 old and young workers were compared and fertility and behaviour were added as blocking  
184 factors, and (iii) *fertility*: fertile and infertile workers were compared and age and behaviour  
185 were added as a blocking factor. The introduction of blocking factors was necessary as samples  
186 were not organized in a symmetric full factorial design resulting in, for example, age biases  
187 when comparing brood carers to foragers (16 young and 8 old brood carers versus 8 young and  
188 16 old foragers, figure 1). Contigs that were differentially expressed (FDR < 0.05), but exhibited  
189 low expression difference (fold change between groups < 1) were removed. This included 3247  
190 behaviour-, 296 age- and 13 fertility-associated genes. One of the contigs  
191 (>philip\_contigs\_output\_c3380) was identified as a chimeric contig containing two similar  
192 sized different ORFs (one first ORF was annotated as Vg3, the second ORF was annotated as



193 *Vg1*, Kohlmeier et al. subm.). We manually split this contig between both ORFs, remapped and  
194 re-counted raw reads and rerun the gene expression analysis. For each of the three factors  
195 (behaviour, age, fertility), separate gene ontology (GO) enrichments were performed for both,  
196 over- and underexpressed genes, using Blast2GO v4.1.9 [83]. Enriched GO terms were then  
197 summarized using ReViGO [84]. A Weighted Gene Coexpression Network Analysis  
198 (WGCNA) [85] was performed on the 20,000 contigs exhibiting the strongest variance in  
199 expression. Eigengene values were extracted and their association was analysed with a GLMM  
200 using *behaviour*, *age*, *fertility* and their interactions as explanatory factors and *colony ID* as a  
201 random factor.

202 We further assessed the expression of candidate genes, which have previously been  
203 identified to be involved in the regulation of division of labour in social insects: *foraging*,  
204 *Insulin like growth factor*, *Insulin receptor 1* and *2*, *Krüppel homolog 1*, *Tyramine receptor 2*,  
205 all orthologs of *Vitellogenin* (*VgC*, *MVg2*, *MVg3*, *Vg-like A*, *Vg-like B*, *Vg-like C*, *Vg receptor*),  
206 *ultraspiracle* [18,24,28,86,87]. To identify *foraging* in our transcriptome, we blasted our  
207 transcriptome against a database containing 16 *foraging* genes from different ant species, honey  
208 bee and *Drosophila melanogaster*. We only changed the annotation of a specific contig to  
209 *foraging*, if the e-value of *foraging* was lower than the e-value of the previous blast result. This  
210 resulted in eleven *foraging* contigs.

211

### 212 *Characterizing the effect of age on behaviour specific gene expression*

213 Many studies compared gene expression of young brood carers and old foragers to identify  
214 genes associated with behaviour [e.g. 25,28,53,54,66–70]. We investigated the effect of not  
215 controlling for age by comparing gene expression of young brood carers (n = 8) and old foragers  
216 (n = 8) from control colonies (Figure 1) using pairwise comparison (age confounded PWC) in  
217 *edgeR* (e.g. used in [31,88–92]). To test whether differences between age confounded PWC and  
218 the age controlled GLM (described in the previous section) depend on whether the dataset was

219 confounded with age or not or on the statistical approach (pairwise comparison *vs.* GLM), we  
220 additionally run a GLM on this age confounded dataset including fertility as a blocking factor  
221 (age confounded GLM). We compared the number and identity of differentially expressed  
222 genes (DEGs) to those, identified with the age controlled GLM. Functional enrichments and  
223 WGCNA were performed as described above.

224 As differences between both age confounded and age controlled approaches can also be  
225 explained by differences in sample size (age confounded dataset: 8 brood carers *vs* 8 foragers;  
226 age controlled dataset: 24 brood carers *vs* 24 foragers), we randomly sampled four young brood  
227 carers, four old brood carers, four young foragers and four old foragers (two of each fertile and  
228 two infertile) from our dataset and identified DEGs with GLM including fertility as a blocking  
229 factor using 1000 permutations (Reduced sample size GLM; RSS GLM). The total number of  
230 possible combinations of samples was 907,200. No combination of samples was used twice.

231

## 232 **Results**

### 233 *DEGs associated with behaviour independent from age and fertility*

234 A total of 448 genes were differentially expressed between the two behavioural castes (226  
235 overexpressed in brood carers, 222 overexpressed in foragers). 54 of these DEGs were also  
236 differentially expressed between young and old workers and 32 between fertile and infertile  
237 workers (Figure 2).

238 Among those genes overexpressed in brood carers, we found several copies of  
239 *Vitellogenin* including *Vg-like A*, *Myrmicine Vg2* (according to Kohlmeier et al. *subm.*), *MVg3*  
240 and the *Vg-Receptor* with *Vg-like A* being the strongest overexpressed gene in brood carers  
241 (FDR =  $5.45 \times 10^{-18}$ ). The expression of *VgC*, *Vg-like B*, and *Vg-like C* was independent from  
242 behavioural caste (Table 1). The expression of all differentially expressed *Vg* orthologs was  
243 positively correlated with each other (Table S3). Especially the expression of *MVg2* and *MVg3*  
244 was tightly linked to each other. Moreover, we found *Neuronal acetylcholine receptor subunit*

245 *alpha-3*, which binds the neurotransmitter acetylcholine [93], and the *Odorant binding protein*  
246 *16*, which is part of the olfactory system in honey bees [70]. Enriched GO terms were grouped  
247 into eight biological processes, mainly represented by lipid transport and lipid biosynthesis  
248 (Figure 3).

249 Genes overexpressed in foragers include *Insulin-like growth factor-binding protein*  
250 *complex acid labile chain (ILGFBP)*, which is associated with binding the Insulin-like growth  
251 factor. Furthermore, *beta hexosaminidase subunit beta* and the *circadian clock-controlled*  
252 *protein* were more expressed in foragers than in brood carers. *Tyramine* and *foraging* were not  
253 differentially expressed (Table 1). Out of those genes overexpressed in foragers, 20.3% were  
254 of viral origin (15.3% *Formica exsecta* virus 2, 2.7% Deformed wing virus, 0.9% *Varroa*  
255 *destructor* virus-1 and Kakugo virus, 0.5% *Nilaparvata lugens* honeydew virus-3). Enriched  
256 GO terms were summarized into 13 biological processes largely represented by RNA-templated  
257 transcription, pteridine-containing compound catabolism and multiple processes linked to  
258 metabolism (Figure 4).

259 Six modules of co-expressed genes were identified using WGCNA (Table S4). One of  
260 these modules was associated with brood care behaviour (GLMM:  $\chi^2 = 4.1$   $p = 0.042$ ), and  
261 exhibited a functional enrichment in metabolism, monocarboxylic acid biosynthesis and  
262 biosynthesis.

263

264 *DEGs associated with age independent from behaviour and fertility*

265 102 genes were differentially expressed between the two age classes (27 overexpressed in  
266 young, 75 in old; Figure 2). The number of these age-specific DEGs is smaller compared to  
267 caste-specific DEGs ( $\chi^2$  test:  $p < 0.0001$ ), but higher than fertility specific DEGs ( $\chi^2$  test:  $p =$   
268 0.001).

269 Among those genes overexpressed in young workers, we detected multiple *cytochrome*  
270 *P450* genes including *CYP4AB2* and *CYP4AB1* that were previously found to exhibit a worker-

271 specific expression in the fire ant *Solenopsis invicta* (Liu and Zhang 2004). Moreover, the  
272 expression of *Elongation of very long fatty acids protein*, potentially involved in cuticular  
273 hydrocarbon synthesis, *Transposable element P transposase* and multiple copies of the muscle  
274 protein *actin*. All genes overexpressed in young workers were combined to a single biological  
275 process (single-organism metabolism; Figure S2).

276 Out of the 75 genes overexpressed in old versus young workers, 36% were of viral origin  
277 including *Formica exsecta* virus 2 (28%), Deformed wing virus (4%), Kakugo virus (2.6%) and  
278 *Spodoptera frugiperda* rhabdo-virus (1.3%). Ten biological processes including RNA-  
279 templated transcription, cellular aromatic compound metabolism, and biosynthesis were linked  
280 to old age (Figure S3).

281

#### 282 *DEGs associated with fertility independent from behaviour and age*

283 A total of 61 genes were differentially expressed between fertile and infertile workers: 49 of  
284 them were overexpressed in fertile and 12 in infertile workers (Figure 2). Among those genes  
285 overexpressed in fertile workers, we found *MVg2* (FDR =  $3.29 \times 10^{-5}$ ), *MVg3* (FDR < 0.003)  
286 and *Vitellogenin-receptor* (FDR < 0.018). The expression of *VgC*, *Vg-like A*, *Vg-like B* and *Vg-*  
287 *like C* was independent from fertility status (all FDR > 0.999). Six biological processes  
288 including lipid transport and mitochondrial electron transport were overrepresented in fertile  
289 compared to infertile workers (Figure S4). In infertile workers, the only overrepresented  
290 biological process was L-phenylalanine metabolism (Figure S5).

291

#### 292 *The combined effect of behaviour and age on gene expression*

293 We used an age confounded subset of the data to characterize the importance of experimentally  
294 controlling for worker age. Pairwise comparisons between young brood carers and old foragers  
295 only (age confounded PWC) revealed a total of 917 DEGs, significantly more than the number  
296 found when controlling for age ( $\chi^2$  test:  $p < 0.0001$ ; Figure 5a). Out of these, 565 were

297 overexpressed in brood carers and 352 overexpressed in foragers resulting in more  
298 overexpressed genes in brood carers than in foragers ( $\chi^2$  test:  $p < 0.0001$ ), which was not found  
299 when controlling for age ( $\chi^2$  test:  $p = 0.841$ ). In brood carers, the number of biological processes  
300 overrepresented was similar to the ones we found when using the age controlled GLM (3 vs. 8;  
301  $\chi^2$  test:  $p = 0.132$ ; Figure S6), but fewer biological processes were detected among the DEGs  
302 of foragers (2 vs. 13;  $\chi^2$  test:  $p = 0.001$ , Figure S7).

303         The age confounded GLM yielded a total of 764 DEGs between both behavioral castes  
304 (Figure 5a): 72.9% more than with the age controlled GLM ( $\chi^2$  test:  $p < 0.0001$ ), but 16.7% less  
305 compared to the age confounded PWC ( $\chi^2$  test:  $p = 0.0002$ ). When applying a GLM on an age  
306 controlled dataset with a reduced sample size (RSS GLM) with 1000 permutations,  $330 \pm 4.3$   
307 DEGs (mean  $\pm$  S.E.) were identified, which is not different from the 442 DEGS found using  
308 the full age controlled dataset ( $p = 0.813$ ; Figure 5a). The DEGs identified with both age  
309 confounded approaches (PWC and GLM) exhibited a lower overlap with those genes identified  
310 with the complete age controlled dataset (Brood carer: PWC: 9.2%; GLM: 35.8% figure 5b;  
311 Forager: PWC: 8.5%; GLM: 27.3% figure 5c) compared to the age controlled RSS GLM (Brood  
312 carer: mean = 65.5%; Forager: mean = 61.7%; figure 5c).

313         A WGCNA on the age confounded PWC dataset yielded 48 modules. Out of these  
314 modules, 14 were associated with brood carers or foragers (Table S5).

315

## 316 **Discussion**

317 In social insects, behavioural specialization of workers (e.g., on brood care and foraging) is  
318 influenced by gene expression. Surprisingly, especially in ants, transcriptomic patterns and  
319 expression biases of candidate genes involved in the regulation of behaviour vary between  
320 studies. The identification of such patterns and genes is difficult, because behaviour is linked  
321 to many other factors such as age and fertility. Thus, transcriptome comparisons of brood carers  
322 and foragers are often confounded by these parameters, which potentially explains diverging

323 results. In this study, we manipulated colonies of the ant *Temnothorax longispinosus* and  
324 assessed gene expression patterns associated with behaviour (brood carer *vs* forager), age  
325 (young *vs* old) and fertility (fertile *vs* infertile) independently. In a second step, we compared  
326 our results to those that would have been obtained if age was confounded with behaviour.

327

### 328 *Genes associated with behavioural task independent from age and fertility*

329 Our study sheds new light on the transcriptomic underpinnings of non-reproductive division of  
330 labour in ants. Gene expression of *T. longispinosus* brood carers was largely represented by  
331 lipid transport and lipid biosynthesis (energy storage; Figure 3). Nutritional status, with  
332 corpulent brood carers and food deprived foragers, is one of the most widespread and consistent  
333 factors mediating worker behaviour [10,19], and influences gene expression in honey bees  
334 [12,18,22,25,26,28] and wasps [29]. In ants however, despite the broad correlative evidence for  
335 brood carers harbouring more lipid storages than foragers [6–9,14,94,95], clear transcriptomic  
336 signatures of nutritional status have so far not been found [30,31]. Only a single study identified  
337 lipid storage and fatty acid metabolism to be enriched functions of genes differentially  
338 expressed between brood carers and foragers [96]. In that study however, transcriptomes of  
339 young brood carers and old foragers were compared. As lipid storages in experimentally hive-  
340 restricted bees are reduced with age and age-dependent reduction in lipid storages has been  
341 found in *Drosophila* males [12,97], it remained unclear whether observed nutrition linked gene  
342 expression is associated with behaviour or with age. Interestingly, we found an increased  
343 investment into lipid biosynthesis in brood carers independent from age. In honey bees, reverted  
344 brood carers do not refill their lipid storages [19] and future research should therefore test  
345 whether old workers in ants, which return to brood caring duties are able to regain lipid storages.

346         Among the genes upregulated in brood carers, we found multiple fat body expressed  
347 copies of egg yolk precursor and storage protein *Vg* (*Vg-like A*, *MVg2*, *MVg3*; Kohlmeier et al.  
348 *subm.*). *Vg-like A* might be of specific importance as its expression was independent from age

349 and fertility, it is mainly expressed in the fat body, has recently been identified as a key regulator  
350 of the behavioural transition from brood care to adult nestmate care and occurs in a large  
351 number of social insect genomes (Kohlmeier et al. *subm.*). Whether the changes in  
352 responsiveness are at least partly linked to the upregulation of the *Odorant binding protein 16*  
353 has to be answered in future. *Conventional Vg* takes over an important role in the regulation of  
354 worker behaviour in honey bees [26,32–37]. However, this *Vg* copy was not differentially  
355 expressed in our study (see Kohlmeier et al. in *subm.* for a *Vg* phylogeny). This indicates that  
356 brood caring behaviour in ants is controlled by different pathways than in honey bees.  
357 Moreover, brood carers overexpressed the brain expressed *Neuronal acetylcholine receptor*  
358 *subunit alpha-3* binds acetylcholine, a neurotransmitter involved in learning in honey bees [93].  
359 However, the role of the receptor for brood caring behaviour should be investigated in the  
360 future.

361 Foragers exhibited increased investment into catabolism and carbohydrate transport  
362 (energy mobilization), as well as multiple metabolic processes (energy usage). Similar to honey  
363 bees, these data indicate that foragers rely on carbohydrate as a main source of energy for their  
364 foraging trips [10]. For example, among the overexpressed genes was *Insulin-like growth*  
365 *factor-binding protein complex acid labile chain*, which is involved in binding of Insulin-like  
366 growth factor (IGF) and part of the IIS pathway [98]. Despite the clear transcriptomic signatures  
367 of nutritional status and metabolism, multiple candidate genes that are part of the cross-talk  
368 between IIS and TOR (i.e. *malvolio*, *foraging*, *Tyramine*) were not differentially expressed. As  
369 these genes are mainly expressed in the brain [62,99,100], we might have been unable to detect  
370 differences in expression, because we used whole body transcriptomes. Alternatively, our  
371 findings might reflect lineage specificity regarding pathway rearrangements, which have been  
372 documented in the honey bee. For instance, the negative relationship between Insulin-like  
373 peptide titres and abdominal lipids in honey bees are a derived stage and reverse in other insects  
374 [12,21]. Potentially, such rearrangements have occurred after bee and ant lineages split. This



375 question needs to be answered in the future, e.g. by age controlled tissue-specific gene  
376 expression comparisons.

377         Apart from genes associated with the regulation of behaviour and nutritional  
378 physiology, we identified multiple genes that potentially fulfil rather supportive functions for  
379 foraging behaviour. Mutations in *Beta hexosaminidase subunit beta*, one of the strongest  
380 differentially expressed genes between brood carers and foragers, are linked to the Sandhoff  
381 disease in humans causing complex symptoms including a reduced locomotive activity [101].  
382 *Clock-controlled protein* is a gene downstream of the circadian clock in *Drosophila*  
383 *melanogaster* [102]. Whether these genes for example contribute to maintaining muscle activity  
384 (*beta hexosaminidase subunit beta*) or correctly timing foraging trips (*clock-controlled protein*)  
385 still needs to be investigated.

386

#### 387 *Genes associated with age independent from behavioural task and fertility*

388 Young age in workers was characterized by the overexpression of several cytochrome *P450*  
389 genes including *CYP4AB 1* and *2*, *Elongation of very long chain fatty acids protein*,  
390 *transposable element P transposase* and several actin genes. *P450 CYP4AB 1* and *2* were shown  
391 to be overexpressed in workers compared to sexuals in the fire ant *Solenopsis invicta* [103].  
392 Overexpression of *Elongation of very long chain fatty acids protein* potentially contributes to  
393 age-dependent differences in cuticular hydrocarbon profiles, which have been reported for  
394 workers of the ant *Diacamma ceylonese* [104]. Old workers in contrast overexpress viral  
395 transcripts, indicative of a higher viral load in aged workers, which was previously documented  
396 in honey bees, in which a sugar-rich diet further increased the viral load of workers [105]. High  
397 viral load might contribute to the increased intrinsic mortality of old compared to young  
398 workers as well as foragers compared to brood carers [77] Interestingly, we did not detect any  
399 typical aging pathways or genes, such as ROS pathways.



400 Age had a much weaker influence on the transcriptome compared to behaviour. This is  
401 in line with honey bee age controlled gene expression studies [67,75], although the age  
402 difference in honey bee brood carers and foragers is few weeks only, where it is at least one  
403 year in our study. Our findings strongly contrast with studies investigating caste (queen vs.  
404 worker) gene expression across different developmental stages and ages, in which more DEGs  
405 were found between different ages or developmental stages than between castes [68,91,106–  
406 108]. The larger gene expression differences between brood carers and foragers in combination  
407 with no upregulation of pathways associated with longevity indicate strong physiological  
408 differences between the two behavioural worker castes, and suggest weak changes with age in  
409 the investment in body repair mechanisms [109].

410

#### 411 *Genes associated with fertility independent from behavioural task and age*

412 Fertility had the weakest effect on overall gene expression. Noteworthy however, *MVg2* and  
413 *MVg3* were highly expressed in fertile compared to infertile workers, whereas the expression  
414 of *Vg-like A* was independent from fertility status. This supports the hypothesis of a sub-  
415 functionalization of *Vg* and *Vg-like* genes. In future, it will be interesting to see whether the  
416 Myrmicine-specific *MVg2* and *MVg3* fulfil fertility-linked functions similar to the ancestral *Vg*  
417 copies e.g. in *Drosophila*.

418

#### 419 *The combined effect of behaviour and age on gene expression*

420 We created age confounded subdatasets to compare gene expression between young brood  
421 carers and old foragers using pairwise comparison (Age confounded PCW) and a GLM  
422 including *fertility* as a blocking factor (Age confounded GLM). This allowed us to investigate  
423 the effect of not experimentally controlling for age. Despite few exceptions (*MVg2*, *clock-*  
424 *controlled protein*), candidate genes involved in the regulation of worker behaviour showed  
425 similar expression patterns across all methods (Table 1). Thus, investigations of specific

426 candidate genes seem to be consistent even with confounded data and highlight the potential  
427 importance of these genes for the regulation of worker behaviour.

428         However, additional analyses, such as GO enrichment, WGCNA and metabolic pathway  
429 comparisons are commonly used and provide valuable insights into broader patterns of gene  
430 expression [27,30,31,67,68,75,87,90,96]. Hence, results and conclusions depend on the number  
431 and identity of large sets of genes, and partly their FDR values and raw read counts provided  
432 as an input. We could show that both age confounded approaches (PWC and GLM) identified  
433 more DEGs than the age controlled approaches (RSS and GLM). These findings are likely to  
434 be the result of additional variation in gene expression that was introduced by workers not only  
435 differing in behaviour but also in age. This additional variation was not a simple combination  
436 of those genes found to be differentially expressed between behaviours and age (Figure S8),  
437 but seems to be rather random with unpredictable effects on follow-up analyses: Whereas GO  
438 term enrichments on the age confounded dataset yielded less enriched biological processes than  
439 the age controlled dataset, more co-expressed modules were found in the WGCNA. Thus, our  
440 data highlight the necessity of experimentally controlling for confounding factors.

441         The use of age confounded datasets might therefore have contributed to the lack of  
442 consensus on clear transcriptomic patterns of worker behaviour, as many studies investigating  
443 gene expression in different behavioural castes did not control for age and fertility [e.g.  
444 28,31,56,57,69–73]. Similar conclusions were recently drawn from a gene expression  
445 comparison between queens and workers, as uncontrolled variation was added by confounding  
446 age when comparing gene expression between both castes [68]. Such effects of experimentally  
447 introduced variation have not only been described for age but also for tissue choice  
448 [68,71,72,78]. We therefore conclude that gene expression analyses aiming at identifying genes  
449 associated with worker behaviour benefits from experimentally controlling for confounding  
450 factors such as age.

451

452 *Conclusions*

453 Taken together, by disentangling gene expression associated with behaviour, age and fertility,  
454 we identified new candidate genes involved in the regulation of non-reproductive behaviour  
455 (*Vg-like A*), showed that candidate genes described in honey bees do not play a role in  
456 *Temnothorax* ants (*Conventional Vg*), and highlight the importance of nutritional physiology  
457 and metabolism in brood carers versus foragers. In respect to expression changes with age, we  
458 detected investment in muscles in young workers, and no evidence for age-dependant  
459 expression of typical longevity genes. We thus provide evidence that experimentally controlling  
460 for confounding factors such as age or behaviour will increase resolution and decrease  
461 transcriptomic noise in future RNAseq studies.

462

463 **References**

- 464 1. Maynard Smith J, Szathmary E. The major transitions in evolution. Oxford: Oxford  
465 University Press; 1995.
- 466 2. Smith A. The wealth of nations. UK: Methuen; 1776.
- 467 3. Wilson EO. The Insect Societies. Cambridge: Harvard University Press; 1971.
- 468 4. Robinson GE. Regulation of division of labor in insect societies. *Annu Rev Entomol.*  
469 1992;37: 637–665.
- 470 5. Wahl LM. Evolving the division of labour: Generalists, specialists and task allocation.  
471 *J Theor Biol.* 2002;219: 371–388. doi:10.1006/jtbi.2002.3133
- 472 6. Porter SD, Jorgensen CD. Foragers of the harvester ant, *Pogonomyrmex owyheei*: a  
473 disposable caste? *Behav Ecol Sociobiol.* 1981;9: 247–256. doi:10.1007/BF00299879
- 474 7. Tschinkel WR. Seasonal life history and nest architecture of a winter-active ant,  
475 *Prenolepis imparis*. *Insectes Soc.* 1987;34: 143–164. doi:10.1007/BF02224081
- 476 8. Tschinkel W. Sociometry and sociogenesis of the harvester ant *Pogonomyrmex badius*:  
477 worker characteristics in relation to colony size and season. *Insectes Soc.* 1998;45:

- 478 385–410.
- 479 9. Schulz DJ, Huang ZY, Robinson GE. Effects of colony food shortage on behavioral  
480 development in honey bees. *Behav Ecol Sociobiol.* 1998;42: 295–303.  
481 doi:10.1007/s002650050442
- 482 10. Toth AL, Robinson GE. Worker nutrition and division of labour in honeybees. *Anim*  
483 *Behav.* 2005;69: 427–435. doi:10.1016/j.anbehav.2004.03.017
- 484 11. Toth AL, Bilof KBJ, Henshaw MT, Hunt JH, Robinson GE. Lipid stores, ovary  
485 development, and brain gene expression in *Polistes metricus* females. *Insectes Soc.*  
486 2009;56: 77–84. doi:10.1007/s00040-008-1041-2
- 487 12. Ament SA, Wang Y, Robinson GE. Nutritional regulation of division of labor in honey  
488 bees: Toward a systems biology perspective. *Wiley Interdiscip Rev Syst Biol Med.*  
489 2010;2: 566–576. doi:10.1002/wsbm.73
- 490 13. Robinson EJH, Feinerman O, Franks NR. Flexible task allocation and the organization  
491 of work in ants. *Proc R Soc B Biol Sci.* 2009;276: 4373–4380.
- 492 14. Bernadou A, Busch J, Heinze J. Diversity in identity: behavioral flexibility, dominance,  
493 and age polyethism in a clonal ant. *Behav Ecol Sociobiol.* 2015;69: 1365–1375.  
494 doi:10.1007/s00265-015-1950-9
- 495 15. Hölldobler B, Carlin NF. Colony founding, queen control and worker reproduction in  
496 the ant *Aphaenogaster* (= *Novomessor*) *cockerelli* (Hymenoptera: Formicidae). *Psyche*  
497 (Stuttg). 1989;96: 131–151.
- 498 16. Kühbandner S, Modlmeier AP, Foitzik S. Age and ovarian development are related to  
499 worker personality and task allocation in the ant *Leptothorax acervorum*. 2014;60:  
500 392–400.
- 501 17. Visscher PK, Dukas R. Survivorship of foraging honey bees. *Insectes Soc.* 1997;44: 1–  
502 5. doi:10.1007/s000400050017
- 503 18. Ament SA, Chan QW, Wheeler MM, Nixon SE, Johnson SP, Rodriguez-Zas SL, et al.

- 504 Mechanisms of stable lipid loss in a social insect. *J Exp Biol.* 2011;214: 3808–3821.  
505 doi:10.1242/jeb.060244
- 506 19. Toth AL, Kantarovich S, Meisel AF, Robinson GE. Nutritional status influences  
507 socially regulated foraging ontogeny in honey bees. *J Exp Biol.* 2005;208: 4641–4649.  
508 doi:10.1242/jeb.01956
- 509 20. Maestro JL, Cobo J, Bellés X. Target of rapamycin (TOR) mediates the transduction of  
510 nutritional signals into juvenile hormone production. *J Biol Chem.* 2009;284: 5506–  
511 5513. doi:10.1074/jbc.M807042200
- 512 21. Morton GJ, Cummings DE, Baskin DG, Barsh GS, Schwartz MW. Central nervous  
513 system control of food intake and body weight. *Nature.* 2006;443: 289–295.  
514 doi:10.1038/nature05026
- 515 22. Nilsen K-A, Ihle KE, Frederick K, Fondrk MK, Smedal B, Hartfelder K, et al. Insulin-  
516 like peptide genes in honey bee fat body respond differently to manipulation of social  
517 behavioral physiology. *J Exp Biol.* 2011;214: 1488–1497. doi:10.1242/jeb.050393
- 518 23. Rodrigues MA, Flatt T. Endocrine uncoupling of the trade-off between reproduction  
519 and somatic maintenance in eusocial insects. *Curr Opin Insect Sci.* Elsevier Inc;  
520 2016;16: 1–8. doi:10.1016/j.cois.2016.04.013
- 521 24. Ament SA, Corona M, Pollock HS, Robinson GE. Insulin signaling is involved in the  
522 regulation of worker division of labor in honey bee colonies. *Proc Natl Acad Sci.*  
523 2008;105: 4226–4231. doi:10.1073/pnas.0800630105
- 524 25. Zayed A, Robinson GE. Understanding the Relationship Between Brain Gene  
525 Expression and Social Behavior: Lessons from the Honey Bee. *Annu Rev Genet.*  
526 2012;46: 591–615. doi:10.1146/annurev-genet-110711-155517
- 527 26. Wang Y, Brent CS, Fennern E, Amdam G V. Gustatory perception and fat body energy  
528 metabolism are jointly affected by vitellogenin and juvenile hormone in honey bees.  
529 *PLoS Genet.* 2012;8. doi:10.1371/journal.pgen.1002779

- 530 27. Khamis AM, Hamilton AR, Medvedeva YA, Alam T, Alam I, Essack M, et al. Insights  
531 into the transcriptional architecture of behavioral plasticity in the honey bee *Apis*  
532 *mellifera*. Sci Rep. Nature Publishing Group; 2015;5: 11136. doi:10.1038/srep11136
- 533 28. Scheiner R, Entler B V., Barron AB, Scholl C, Thamm M. The effects of fat body  
534 tyramine level on gustatory responsiveness of honeybees (*Apis mellifera*) differ  
535 between behavioral castes. Front Syst Neurosci. 2017;11: 1–8.  
536 doi:10.3389/fnsys.2017.00055
- 537 29. Daugherty THF, Toth AL, Robinson GE. Nutrition and division of labor: Effects on  
538 foraging and brain gene expression in the paper wasp *Polistes metricus*. Mol Ecol.  
539 2011;20: 5337–5347. doi:10.1111/j.1365-294X.2011.05344.x
- 540 30. Manfredini F, Lucas C, Nicolas M, Keller L, Shoemaker D, Grozinger CM. Molecular  
541 and social regulation of worker division of labour in fire ants. Mol Ecol. 2014;23: 660–  
542 72. doi:10.1111/mec.12626
- 543 31. Feldmeyer B, Elsner D, Foitzik S. Gene expression patterns associated with caste and  
544 reproductive status in ants: worker-specific genes are more derived than queen-specific  
545 ones. Mol Ecol. 2014;23: 151–161. doi:10.1111/mec.12490
- 546 32. Marco Antonio DS, Guidugli-Lazzarini KR, do Nascimento AM, Simões ZLP,  
547 Hartfelder K. RNAi-mediated silencing of vitellogenin gene function turns honeybee  
548 (*Apis mellifera*) workers into extremely precocious foragers. Naturwissenschaften.  
549 2008;95: 953–961. doi:10.1007/s00114-008-0413-9
- 550 33. Amdam G V., Norberg K, Hagen A, Omholt SW. Social exploitation of *vitellogenin*.  
551 Proc Natl Acad Sci U S A. 2003;100: 1799–802. doi:10.1073/pnas.0333979100
- 552 34. Nunes FMF, Ihle KE, Mutti NS, Simões ZLP, Amdam G V. The gene *vitellogenin*  
553 affects microRNA regulation in honey bee (*Apis mellifera*) fat body and brain. J Exp  
554 Biol. 2013;216: 3724–32. doi:10.1242/jeb.089243
- 555 35. Guidugli KR, Nascimento AM, Amdam G V., Barchuk AR, Omholt S, Simões ZLP, et

- 556 al. *Vitellogenin* regulates hormonal dynamics in the worker caste of a eusocial insect.  
557 FEBS Lett. 2005;579: 4961–4965. doi:10.1016/j.febslet.2005.07.085
- 558 36. Amdam G V, Norberg K, Page RE, Erber J, Scheiner R. Downregulation of  
559 *vitellogenin* gene activity increases the gustatory responsiveness of honey bee workers  
560 (*Apis mellifera*). Behav Brain Res. 2006;169: 201–205. doi:10.1016/j.bbr.2006.01.006
- 561 37. Wheeler MM, Ament SA, Rodriguez-Zas SL, Southey B, Robinson GE. Diet and  
562 endocrine effects on behavioral maturation-related gene expression in the pars  
563 intercerebralis of the honey bee brain. J Exp Biol. 2015;218: 4005–4014.  
564 doi:10.1242/jeb.119420
- 565 38. Robinson GE, Vargo EL. Juvenile hormone in adult eusocial hymenoptera:  
566 Gonadotropin and behavioral pacemaker. Arch Insect Biochem Physiol. 1997;35: 559–  
567 583.
- 568 39. Engel KC, Stökl J, Schweizer R, Vogel H, Ayasse M, Ruther J, et al. A hormone-  
569 related female anti-aphrodisiac signals temporary infertility and causes sexual  
570 abstinence to synchronize parental care. Nat Commun. 2016;7: 1–10.  
571 doi:10.1038/ncomms11035
- 572 40. Azevedo DO, de Paula SO, Zanuncio JC, Martinez LC, Serrão JE. Juvenile hormone  
573 downregulates vitellogenin production in *Ectatomma tuberculatum* (Hymenoptera:  
574 Formicidae) sterile workers. J Exp Biol. 2015;219: 103–108. doi:10.1242/jeb.127712
- 575 41. Amsalem E, Malka O, Grozinger C, Hefetz A. Exploring the role of juvenile hormone  
576 and vitellogenin in reproduction and social behavior in bumble bees. BMC Evol Biol.  
577 BMC Evolutionary Biology; 2014;14: 45. doi:10.1186/1471-2148-14-45
- 578 42. Brent CS, Vargo EL. Changes in juvenile hormone biosynthetic rate and whole body  
579 content in maturing virgin queens of *Solenopsis invicta*. J Insect Physiol. 2003;49:  
580 967–974. doi:10.1016/S0022-1910(03)00166-5
- 581 43. Libbrecht R, Corona M, Wende F, Azevedo DO, Serrão JE, Keller L. Interplay

- 582 between insulin signaling, juvenile hormone, and vitellogenin regulates maternal  
583 effects on polyphenism in ants. *Proc Natl Acad Sci U S A*. 2013;110: 11050–5.  
584 doi:10.1073/pnas.1221781110
- 585 44. Pamminger T, Treanor D, Hughes WOH. Pleiotropic effects of juvenile hormone in ant  
586 queens and the escape from the reproduction-immunocompetence trade-off. *Proc Biol*  
587 *Sci*. 2016;283: 20152409-. doi:10.1098/rspb.2015.2409
- 588 45. Wurm Y, Wang J, Riba-Grognuz O, Corona M, Nygaard S, Hunt BG, et al. The  
589 genome of the fire ant *Solenopsis invicta*. *Proc Natl Acad Sci*. 2011;108: 5679–5684.  
590 doi:10.1073/pnas.1009690108
- 591 46. Corona M, Libbrecht R, Wurm Y, Riba-grognuz O, Studer RA, Keller L. *Vitellogenin*  
592 underwent subfunctionalization to acquire caste and behavioral specific expression in  
593 the harvester ant *Pogonomyrmex barbatus*. *PLoS Genet*. 2013;9: e1003730.  
594 doi:10.1371/journal.pgen.1003730
- 595 47. Oxley PR, Ji L, Fetter-Pruneda I, McKenzie SK, Li C, Hu H, et al. The genome of the  
596 clonal raider ant *Cerapachys biroi*. *Curr Biol*. 2014;24: 451–458.  
597 doi:10.1016/j.cub.2014.01.018
- 598 48. Morandin C, Havukainen H, Kulmuni J, Dhaygude K, Trontti K, Helanterä H. Not only  
599 for egg yolk-functional and evolutionary insights from expression, selection, and  
600 structural analyses of formica ant *vitellogenins*. *Mol Biol Evol*. 2014;31: 2181–2193.  
601 doi:10.1093/molbev/msu171
- 602 49. Salmela H, Sundström L. Vitellogenin in inflammation and immunity in social insects.  
603 *Inflamm Cell Signal*. 2017;4: e1506. doi:10.14800/ics.1506
- 604 50. Ben-Shahar Y, Robichon A, Sokolowski MB, Robinson GE. Influence of gene action  
605 across different time scales on behavior. *Science*. 2002;296: 741–744.  
606 doi:10.1126/science.1069911
- 607 51. Heylen K, Gobin B, Billen J, Hu TT, Arckens L, Huybrechts R. *Amfor* expression in



- 608 the honeybee brain: A trigger mechanism for nurse-forager transition. *J Insect Physiol.*  
609 2008;54: 1400–1403. doi:10.1016/j.jinsphys.2008.07.015
- 610 52. Thamm M, Scheiner R. PKG in honey bees: Spatial expression, *Amfor* gene  
611 expression, sucrose responsiveness, and division of labor. *J Comp Neurol.* 2014;522:  
612 1786–1799.
- 613 53. Scheiner R, Page RE, Erber J. The effects of genotype, foraging role, and sucrose  
614 responsiveness on the tactile learning performance of honey bees (*Apis mellifera L.*).  
615 *Neurobiol Learn Mem.* 2001;76: 138–150. doi:10.1006/nlme.2000.3996
- 616 54. Tobbach J, Mommaerts V, Vandersmissen HP, Smagghe G, Huybrechts R. Age- and  
617 task-dependent *foraging* gene expression in the bumblebee *Bombus terrestris*. *Arch*  
618 *Insect Biochem Physiol.* 2011;76: 30–42. doi:10.1002/arch.20401
- 619 55. Toth AL, Varala K, Henshaw MT, Rodriguez-Zas SL, Hudson ME, Robinson GE.  
620 Brain transcriptomic analysis in paper wasps identifies genes associated with behaviour  
621 across social insect lineages. *Proc R Soc B Biol Sci.* 2010;277: 2139–2148.  
622 doi:10.1098/rspb.2010.0090
- 623 56. Bockoven AA, Coates CJ, Eubanks MD. Colony-level behavioral variation correlates  
624 with differences in expression of the *foraging* gene in red imported fire ants. *Mol Ecol.*  
625 2017;12: 3218–3221. doi:10.1111/mec.14347
- 626 57. Ingram KK, Oefner P, Gordon DM. Task-specific expression of the *foraging* gene in  
627 harvester ants. *Mol Ecol.* 2005;14: 813–818. doi:10.1111/j.1365-294X.2005.02450.x
- 628 58. Kodaira Y, Ohtsuki H, Yokoyama J, Kawata M. Size-dependent *foraging* gene  
629 expression and behavioral caste differentiation in *Bombus ignitus*. *BMC Res Notes.*  
630 2009;2: 1–5. doi:10.1186/1756-0500-2-184
- 631 59. Lucas C, Sokolowski MB. Molecular basis for changes in behavioral state in ant social  
632 behaviors. *Proc Natl Acad Sci U S A.* 2009;106: 6351635–6.  
633 doi:10.1073/pnas.0809463106

- 634 60. Oettler J, Nachtigal AL, Schrader L. Expression of the *foraging* gene is associated with  
635 age polyethism, not task preference, in the ant *Cardiocondyla obscurior*. PLoS One.  
636 2015;10: e0144699. doi:10.1371/journal.pone.0144699
- 637 61. Ingram KK, Kleeman L, Peteru S. Differential regulation of the *foraging* gene  
638 associated with task behaviors in harvester ants. BMC Ecol. BioMed Central Ltd;  
639 2011;11: 19. doi:10.1186/1472-6785-11-19
- 640 62. Ben-Shahar Y, Dudek NL, Robinson GE. Phenotypic deconstruction reveals  
641 involvement of manganese transporter *malvolio* in honey bee division of labor. J Exp  
642 Biol. 2004;207: 3281–3288. doi:10.1242/jeb.01151
- 643 63. Mehlferber EC, Benowitz KM, Roy-Zokan EM, McKinney EC, Cunningham CB,  
644 Moore AJ. Duplication and sub/neofunctionalization of *malvolio* , an insect homolog of  
645 *Nramp* , in the subsocial beetle *Nicrophorus vespilloides*. Genes|Genomes|Genetics.  
646 2017;7: 3393–3403. doi:10.1534/g3.117.300183
- 647 64. Schulz DJ, Barron AB, Robinson GE. A role for octopamine in honey bee division of  
648 labor. Brain Behav Evol. 2002;60: 350–359. doi:10.1159/000067788
- 649 65. Scheiner R, Plückerhahn S, Öney B, Blenau W, Erber J. Behavioural pharmacology of  
650 octopamine, tyramine and dopamine in honey bees. Behav Brain Res. 2002;136: 545–  
651 553.
- 652 66. Barron AB, Maleszka R, Meer RK Vander, Robinson GE. Octopamine modulates  
653 honey bee dance behavior. Proc Natl Acad Sci. 2007;104: 1703–1707.
- 654 67. Whitfield CW, Cziko A-M, Robinson GE. Gene expression profiles in the brain predict  
655 behavior in individual honey bees. Science. 2003;302: 296–299.  
656 doi:10.1126/science.1086807
- 657 68. Lucas ER, Romiguier J, Keller L. Gene expression is more strongly influenced by age  
658 than caste in the ant *Lasius niger*. Mol Ecol. 2017;38: 42–49. doi:10.1111/mec.14256
- 659 69. Cardoso-Júnior CAM, Silva RP, Borges NA, de Carvalho WJ, Walter SL, Simões ZLP,

- 660 et al. *Methyl farnesoate epoxidase (mfe)* gene expression and juvenile hormone titers in  
661 the life cycle of a highly eusocial stingless bee, *Melipona scutellaris*. *J Insect Physiol.*  
662 Elsevier; 2017;101: 185–194. doi:10.1016/j.jinsphys.2017.08.001
- 663 70. Zhao H, Luo Y, Lee J, Zhang X, Liang Q, Zeng X. The *odorant-binding protein* gene  
664 *obp11* shows different spatiotemporal roles in the olfactory system of *Apis mellifera*  
665 *ligustica* and *Apis cerana cerana*. *Sociobiology*. 2013;60: 429–435.  
666 doi:10.13102/sociobiology.v60i4.429-435
- 667 71. Johnson BR, Jasper WC. Complex patterns of differential expression in candidate  
668 master regulatory genes for social behavior in honey bees. *Behav Ecol Sociobiol.*  
669 *Behavioral Ecology and Sociobiology*; 2016;70: 1033–1043. doi:10.1007/s00265-016-  
670 2071-9
- 671 72. Johnson BR, Atallah J, Plachetzki DC. The importance of tissue specificity for RNA-  
672 seq: Highlighting the errors of composite structure extractions. *BMC Genomics*.  
673 2013;14. doi:10.1186/1471-2164-14-586
- 674 73. Erkkilä T, Lehmusvaara S, Ruusuvuori P, Visakorpi T, Shmulevich I, Lähdesmäki H.  
675 Probabilistic analysis of gene expression measurements from heterogeneous tissues.  
676 *Bioinformatics*. 2010;26: 2571–2577. doi:10.1093/bioinformatics/btq406
- 677 74. Foitzik S, Herbers JM. Colony structure of a slavemaking ant. II. Frequency of slave  
678 raids and impact on the host population. *Evolution (N Y)*. 2001;55: 316–323.  
679 doi:10.1111/j.0014-3820.2001.tb01296.x
- 680 75. Alaux C, Le Conte Y, Adams HA, Rodriguez-Zas S, Grozinger CM, Sinha S, et al.  
681 Regulation of brain gene expression in honey bees by brood pheromone. *Genes, Brain*  
682 *Behav*. 2009;8: 309–319. doi:10.1111/j.1601-183X.2009.00480.x
- 683 76. Foitzik S, Herbers JM. Colony structure of a slavemaking ant. I. Intracolony  
684 relatedness, worker reproduction, and polydomy. *Evolution (N Y)*. 2001;55: 307–315.  
685 doi:10.1111/j.0014-3820.2001.tb01295.x

- 686 77. Kohlmeier P, Negroni MA, Kever M, Emmling S, Stypa H, Feldmeyer B, et al.  
687 Intrinsic worker mortality depends on behavioral caste and the queens' presence in a  
688 social insect. *Sci Nat. The Science of Nature*; 2017;104: 34. doi:10.1007/s00114-017-  
689 1452-x
- 690 78. Weitekamp CA, Libbrecht R, Keller L. Genetics and evolution of social behavior in  
691 insects. *Annu Rev Genet.* 2017;51: 219–239. doi:10.1146/annurev-genet-120116-  
692 024515
- 693 79. Bolger AM, Lohse M, Usadel B. Trimmomatic: A flexible trimmer for Illumina  
694 sequence data. *Bioinformatics.* 2014;30: 2114–2120.  
695 doi:10.1093/bioinformatics/btu170
- 696 80. Li W, Godzik A. Cd-hit: A fast program for clustering and comparing large sets of  
697 protein or nucleotide sequences. *Bioinformatics.* 2006;22: 1658–1659.  
698 doi:10.1093/bioinformatics/btl158
- 699 81. Trapnell C, Pachter L, Salzberg SL. TopHat: Discovering splice junctions with RNA-  
700 Seq. *Bioinformatics.* 2009;25: 1105–1111. doi:10.1093/bioinformatics/btp120
- 701 82. Robinson MD, McCarthy DJ, Smyth GK. edgeR: A Bioconductor package for  
702 differential expression analysis of digital gene expression data. *Bioinformatics.*  
703 2009;26: 139–140. doi:10.1093/bioinformatics/btp616
- 704 83. Götz S, Garcia-Gómez JM, Terol J, Williams TD, Nagaraj SH, Nueda MJ, et al. High-  
705 throughput functional annotation and data mining with the Blast2GO suite. *Nucleic*  
706 *Acids Res.* 2008;36: 3420–3435. doi:10.1093/nar/gkn176
- 707 84. Supek F, Bošnjak M, Škunca N, Šmuc T. Revigo summarizes and visualizes long lists  
708 of gene ontology terms. *PLoS One.* 2011;6. doi:10.1371/journal.pone.0021800
- 709 85. Langfelder P, Horvath S. WGCNA: an R package for weighted correlation network  
710 analysis. *BMC Bioinformatics.* 2008;9: 559. doi:10.1186/1471-2105-9-559
- 711 86. Grozinger CM, Sharabash NM, Whitfield CW, Robinson GE. Pheromone-mediated

- 712 gene expression in the honey bee brain. *Proc Natl Acad Sci.* 2003;100: 14519–14525.  
713 doi:10.1073/pnas.2335884100
- 714 87. Ament SA, Wang Y, Chen CC, Blatti CA, Hong F, Liang ZS, et al. The transcription  
715 factor *ultraspiracle* influences honey bee social behavior and behavior-related gene  
716 expression. *PLoS Genet.* 2012;8. doi:10.1371/journal.pgen.1002596
- 717 88. Landis GN, Abdueva D, Skvortsov D, Yang J, Rabin BE, Carrick J, et al. Similar gene  
718 expression patterns characterize aging and oxidative stress in *Drosophila*  
719 *melanogaster*. *Proc Natl Acad Sci.* 2004;101: 7663–7668.  
720 doi:10.1073/pnas.0307605101
- 721 89. Grozinger CM, Fan Y, Hoover SER, Winston ML. Genome-wide analysis reveals  
722 differences in brain gene expression patterns associated with caste and reproductive  
723 status in honey bees (*Apis mellifera*). *Mol Ecol.* 2007;16: 4837–4848.  
724 doi:10.1111/j.1365-294X.2007.03545.x
- 725 90. Ferreira PG, Patalano S, Chauhan R, Ffrench-Constant R, Gabaldón T, Guigó R, et al.  
726 Transcriptome analyses of primitively eusocial wasps reveal novel insights into the  
727 evolution of sociality and the origin of alternative phenotypes. *Genome Biol.* 2013;14.  
728 doi:10.1186/gb-2013-14-2-r20
- 729 91. Harrison MC, Hammond RL, Mallon EB. Reproductive workers show queenlike gene  
730 expression in an intermediately eusocial insect, the buff-tailed bumble bee *Bombus*  
731 *terrestris*. *Mol Ecol.* 2015;24: 3043–3063. doi:10.1111/mec.13215
- 732 92. Feldmeyer B, Mazur J, Beros S, Lerp H, Binder H, Foitzik S. Gene expression patterns  
733 underlying parasite-induced alterations in host behaviour and life history. *Mol Ecol.*  
734 2016;25: 648–660. doi:10.1111/mec.13498
- 735 93. Shapira M, Thompson CK, Soreq H, Robinson GE. Changes in neuronal  
736 acetylcholinesterase gene expression and division of labor in honey bee colonies. *J Mol*  
737 *Neurosci.* 2001;17: 1–12. doi:10.1385/JMN:17:1:1

- 738 94. Robinson EJH, Feinerman O, Franks NR. Flexible task allocation and the organization  
739 of work in ants. 2015;276: 4373–4380.
- 740 95. Silberman RE, Gordon D, Ingram KK. Nutrient stores predict task behaviors in diverse  
741 ant species. *Insectes Soc.* Springer International Publishing; 2016;63: 299–307.  
742 doi:10.1007/s00040-016-0469-z
- 743 96. Qiu H, Zhao C, He Y. On the molecular basis of division of labor in *Solenopsis invicta*  
744 (Hymenoptera: Formicidae) workers: RNA-seq Analysis. *J Insect Sci.* 2017;17: 1–9.  
745 doi:10.1093/jisesa/iex002
- 746 97. Vermeulen CJ, Van De Zande L, Bijlsma R. Developmental and age-specific effects of  
747 selection on divergent virgin life span on fat content and starvation resistance in  
748 *Drosophila melanogaster*. *J Insect Physiol.* 2006;52: 910–919.  
749 doi:10.1016/j.jinsphys.2006.05.014
- 750 98. Leong SR, Baxter RC, Camerato T, Dai J, Wood WI. Structure and functional  
751 expression of the acid-labile subunit of the insulin-like growth factor-binding protein  
752 complex. *Mol Endocrinol.* 1992;6: 870–876.
- 753 99. Ben-Shahar Y, Leung H-T, Pak WL, Sokolowksi MB, Robinson GE. cGMP-dependent  
754 changes in phototaxis: a possible role for the *foraging* gene in honey bee division of  
755 labor. *J Exp Biol.* 2003;206: 2507–2515. doi:10.1242/jeb.00442
- 756 100. Wagener-Hulme C, Kuehn JC, Schulz DJ, Robinson GE. Biogenic amines and division  
757 of labor in honey bee colonies. *J Comp Physiol - A Sensory, Neural, Behav Physiol.*  
758 1999;184: 471–479. doi:10.1007/s003590050347
- 759 101. Sandhoff K, Andreae U, Jatzkewitz H. Deficient hexosaminidase activity in an  
760 exceptional case of Tay-Sachs disease with additional storage of kidney globoside in  
761 visceral organs. *Life Sci.* 1968;7: 283–288. Available:  
762 <http://www.ncbi.nlm.nih.gov/pubmed/5651108>
- 763 102. Lorenz LJ, Hall J, Rosbash M. Expression of a *Drosophila* messenger-RNA is under

- 764 circadian clock control during pupation. *Development*. 1989;107: 869–880.
- 765 103. Liu N, Zhang L. *CYP4AB1*, *CYP4AB2*, and *Gp-9* gene overexpression associated with  
766 workers of the red imported fire ant, *Solenopsis invicta* Buren. *Gene*. 2004;327: 81–87.  
767 doi:10.1016/j.gene.2003.11.002
- 768 104. Cuvillier-Hot V, Cobb M, Malosse C, Peeters C. Sex, age and ovarian activity affect  
769 cuticular hydrocarbons in *Diacamma ceylonense*, a queenless ant. *J Insect Physiol*.  
770 2001;47: 485–493. doi:10.1016/S0022-1910(00)00137-2
- 771 105. DeGrandi-Hoffman G, Chen Y, Huang E, Huang MH. The effect of diet on protein  
772 concentration, hypopharyngeal gland development and virus load in worker honey bees  
773 (*Apis mellifera* L.). *J Insect Physiol*. Elsevier Ltd; 2010;56: 1184–1191.  
774 doi:10.1016/j.jinsphys.2010.03.017
- 775 106. Hoffman EA, Goodisman MA. Gene expression and the evolution of phenotypic  
776 diversity in social wasps. *BMC Biol*. 2007;5: 23. Available:  
777 [http://www.ncbi.nlm.nih.gov/entrez/query.fcgi?cmd=Retrieve&db=PubMed&dopt=Cit](http://www.ncbi.nlm.nih.gov/entrez/query.fcgi?cmd=Retrieve&db=PubMed&dopt=Citation&list_uids=17504526)  
778 [ation&list\\_uids=17504526](http://www.ncbi.nlm.nih.gov/entrez/query.fcgi?cmd=Retrieve&db=PubMed&dopt=Citation&list_uids=17504526)
- 779 107. Ometto L, Shoemaker D, Ross KG, Keller L. Evolution of gene expression in fire ants:  
780 The effects of developmental stage, caste, and species. *Mol Biol Evol*. 2011;28: 1381–  
781 1392. doi:10.1093/molbev/msq322
- 782 108. Smith CR, Helms Cahan S, Kemena C, Brady SG, Yang W, Bornberg-Bauer E, et al.  
783 How do genomes create novel phenotypes? Insights from the loss of the worker caste  
784 in ant social parasites. *Mol Biol Evol*. 2015;32: 2919–2931.  
785 doi:10.1093/molbev/msv165
- 786 109. Kramer BH, Schaible R. Life span evolution in eusocial workers-A theoretical  
787 approach to understanding the effects of extrinsic mortality in a hierarchical system.  
788 *PLoS One*. 2013;8: e61813. doi:10.1371/journal.pone.0061813  
789

790

791

792

793

794

795



796 **Figures**

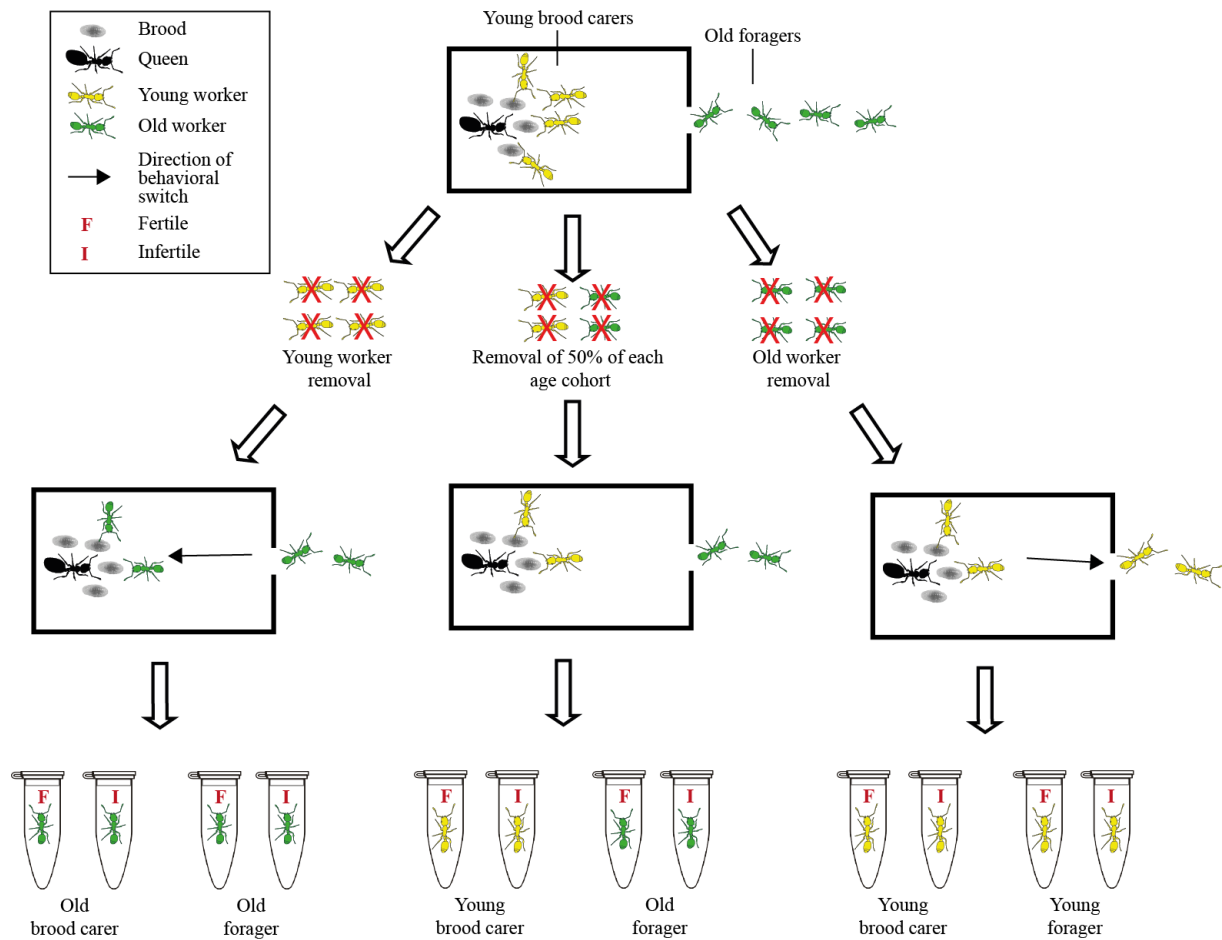

797

798 **Figure 1: Overview of colony demography manipulations.** Colony demographics were manipulated

799 to generate foragers and brood carers of both age classes. From each colony we sampled eight brood

800 carers and eight foragers half of each fertile and half of each infertile.

801

802

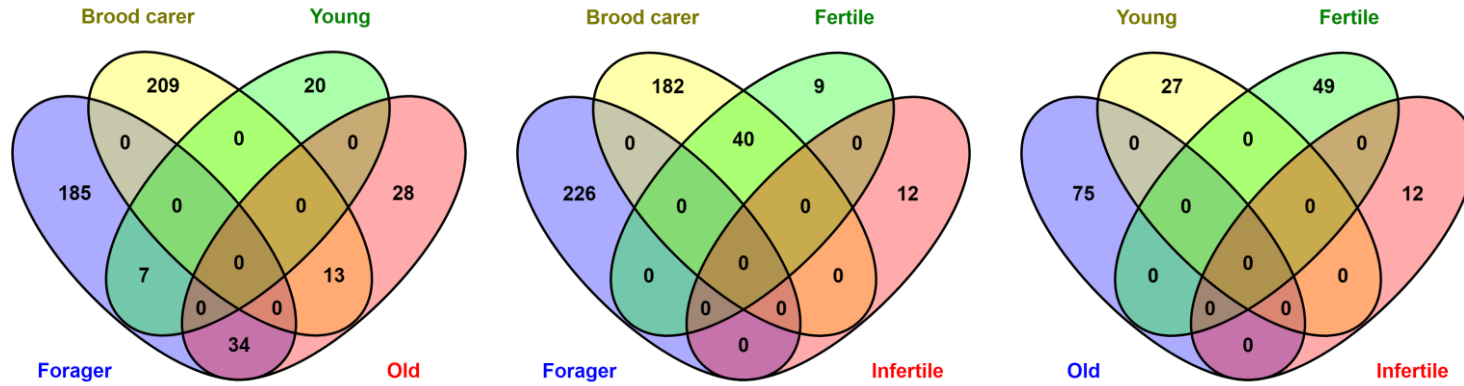

803

804 **Figure 2:** Venn diagrams of genes found to be differentially expressed between brood carers and foragers (left and center) young and old workers  
805 (left and right) and fertile and infertile workers (center and right) and their overlap with each other.

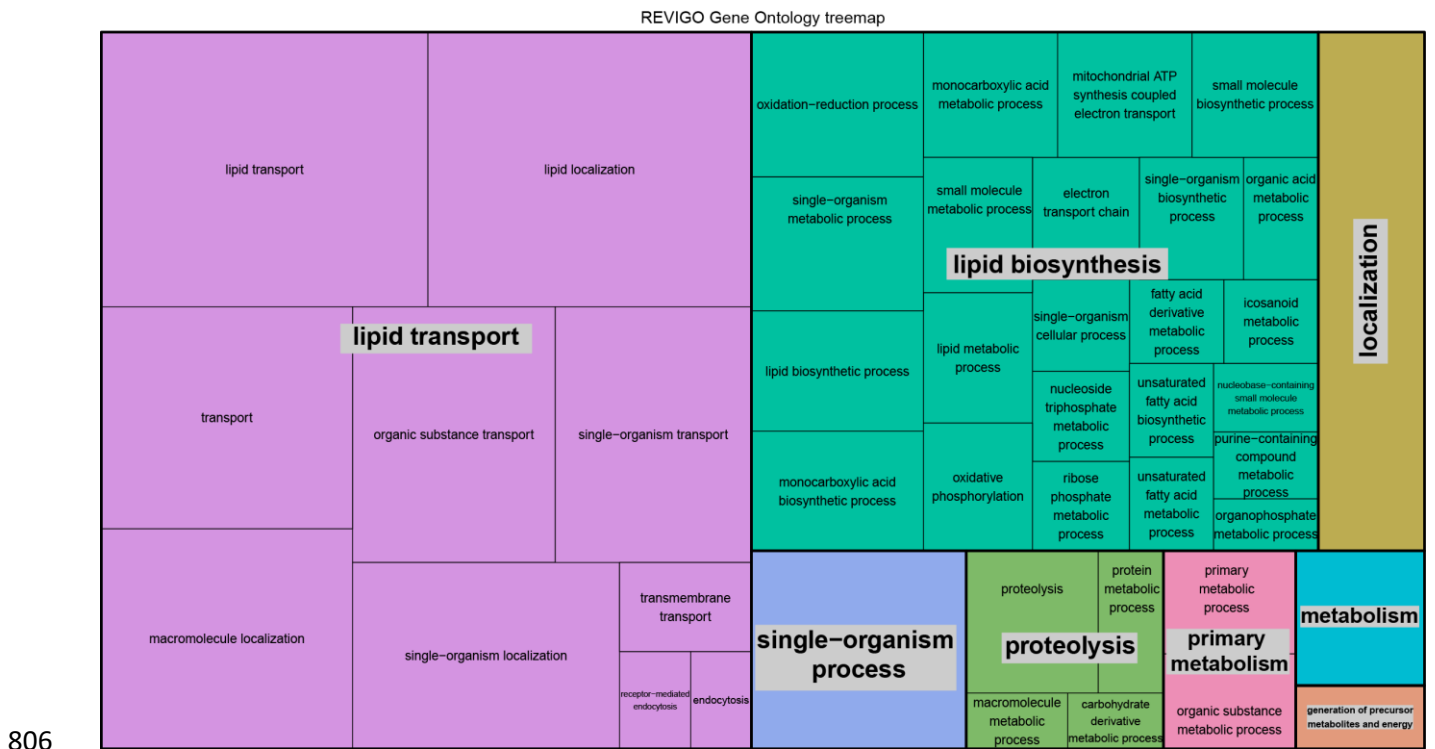

807 **Figure 3:** Biological processes overrepresented in the list of genes upregulated in brood carers compared  
 808 to foragers independent from age and fertility.

809

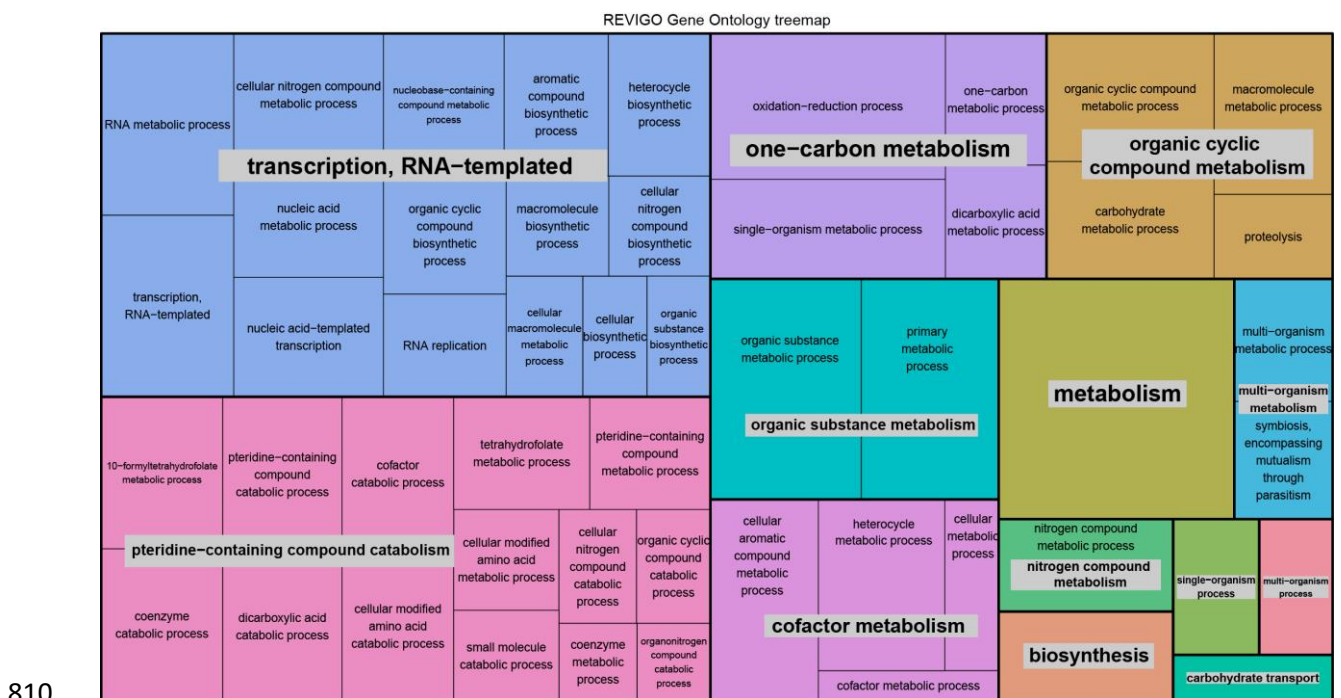

811 **Figure 4:** Biological processes overrepresented in the list of genes upregulated in foragers compared to  
 812 brood carers independent from age and fertility.

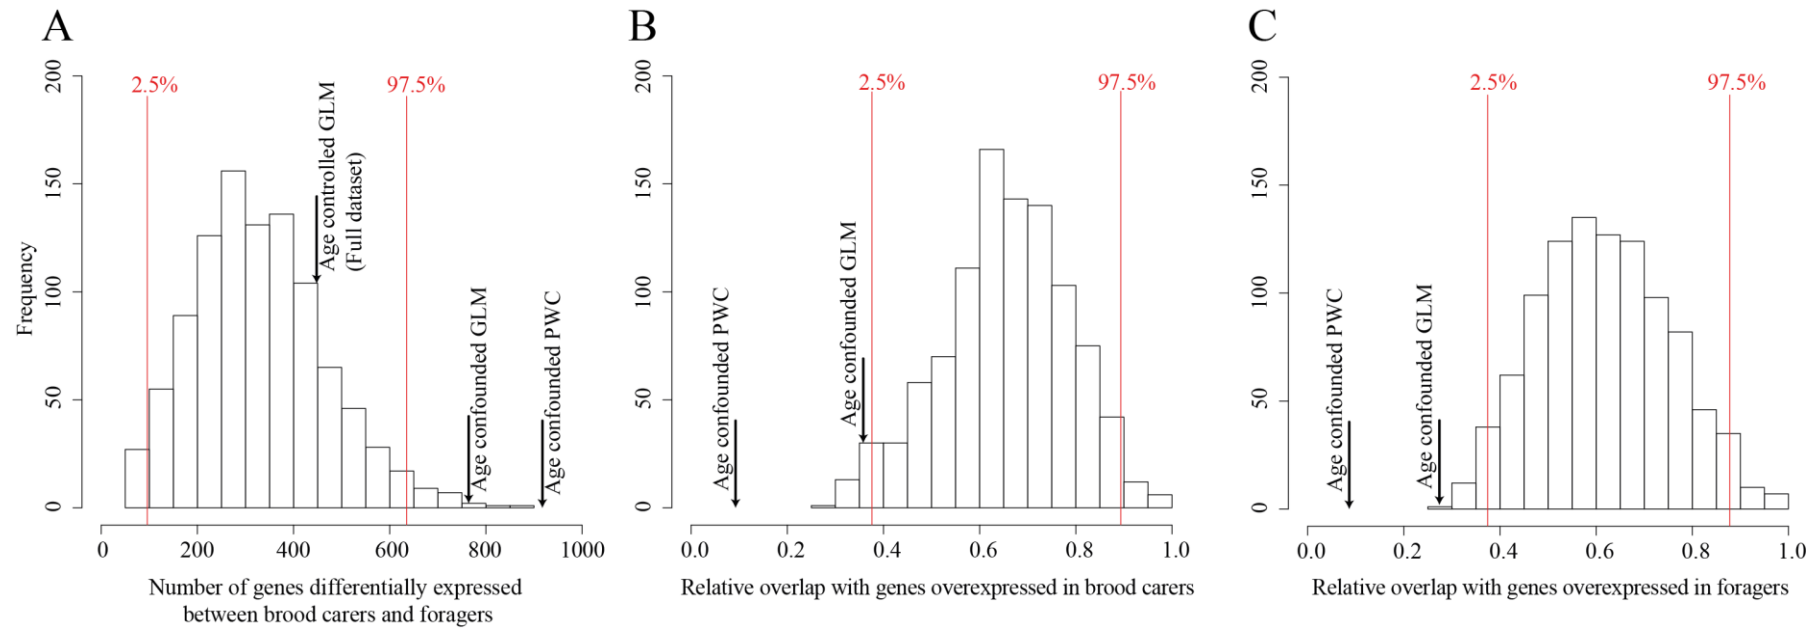

813

814 **Figure 5: Comparison of age controlled and age confounded gene expression analyses.** A) Number of differentially expressed genes identified  
 815 when comparing brood carers and foragers in an age controlled, reduced sample size GLM (RSS) with 1000 permutations (Bars). B) and C) Relative  
 816 overlap between the RSS (bars), the age confounded GLM and PWC with the genes found to be upregulated in brood carers (B) and foragers (C) using  
 817 the age controlled GLM on the full dataset. 5% confidence intervals are given in red. PWC: Pairwise comparison. GLM: Generalized linear model.

818

## 819 Tables

820 **Table1:** Overview of the candidate genes previously described to be associated with worker behaviour and their expression  
 821 bias using different methods and datasets. A log fold change (logFC) < 0 represents an expression bias towards brood carers  
 822 (caste), young (age) or fertile (fertility) workers. Expression was only considered as biased if FDR < 0.05 and logFC < -1 or >  
 823 1. Significant expression biases are given in bold. Genes labelled with \* exhibited different caste expression biases across the  
 824 different methods. PCW: Pairwise comparison ; RSS: Reduced sample size.

| Gene                             | Expression bias in age controlled GLM |                                              | Caste dependent expression bias in age confounded PCW | Caste dependent expression bias in age confounded GLM | Relative frequency of expression bias in RSS age controlled GLM |
|----------------------------------|---------------------------------------|----------------------------------------------|-------------------------------------------------------|-------------------------------------------------------|-----------------------------------------------------------------|
|                                  |                                       |                                              |                                                       |                                                       |                                                                 |
| <i>Beta hexosaminidase</i>       | Caste                                 | <b>FDR &lt; 0.0001</b><br><b>logFC = 2.1</b> | FDR < 0.001<br><br>logFC = 4.5                        | FDR < 0.001<br><br>logFC = 2.6                        | B < F: 99.3 %<br><br>B > F: 0%<br><br>B = F: 0.7%               |
|                                  | Age                                   | FDR = 0.850<br><br>logFC = 0.2               |                                                       |                                                       |                                                                 |
|                                  | Fertility                             | FDR = 0.999<br><br>logFC = 0.5               |                                                       |                                                       |                                                                 |
| <i>Clock controlled protein*</i> | Caste                                 | <b>FDR &lt; 0.0001</b><br><b>logFC = 1.5</b> | <b>FDR = 0.048</b><br><br><b>logFC = -7.9</b>         | <b>FDR &lt; 0.001</b><br><br><b>logFC = 1.6</b>       | B < F: 95.6 %<br><br>B > F: 0%<br><br>B = F: 4.4%               |
|                                  | Age                                   | FDR = 0.884<br><br>logFC = 0.1               |                                                       |                                                       |                                                                 |
|                                  | Fertility                             | FDR = 0.999<br><br>logFC = 0.5               |                                                       |                                                       |                                                                 |
| <i>Foraging</i>                  | Caste                                 | FDR = 0.131<br><br>logFC = -0.1              | FDR = 0.265<br><br>logFC = -1.3                       | FDR = 0.387<br><br>logFC = -0.2                       | B < F: 0.2 %<br><br>B > F: 3%                                   |

|                           |              |                                              |                                             |                             |                                            |
|---------------------------|--------------|----------------------------------------------|---------------------------------------------|-----------------------------|--------------------------------------------|
|                           | Age          | FDR = 0.769<br>logFC = 0.1                   |                                             |                             | B = F: 96,8%                               |
|                           | Fertility    | FDR = 0.999<br>logFC = -0.2                  |                                             |                             |                                            |
| <i>ILGF1BP</i>            | <b>Caste</b> | <b>FDR &lt; 0.0001</b><br><b>logFC = 1.2</b> | <b>FDR &lt; 0.001</b><br><b>logFC = 3.2</b> | FDR < 0.0001<br>logFC = 2.4 | B < F: 87.5 %<br>B > F: 0%<br>B = F: 12.5% |
|                           | Age          | FDR = 0.880<br>logFC = 0.1                   |                                             |                             |                                            |
|                           | Fertility    | FDR = 0.381<br>logFC = 1.0                   |                                             |                             |                                            |
| <i>Insulin receptor 1</i> | Caste        | FDR = 0.001<br>logFC = -0.4                  | FDR = 0.505<br>logFC = -0.7                 | FDR = 0.008<br>logFC = 0.7  | B < F: 0 %<br>B > F: 0%<br>B = F: 100%     |
|                           | Age          | FDR = 0.989<br>logFC = 0.4                   |                                             |                             |                                            |
|                           | Fertility    | FDR = 0.999<br>logFC = -0.1                  |                                             |                             |                                            |
| <i>Insulin receptor 2</i> | Caste        | FDR = 0.001<br>logFC = -0.4                  | FDR = 0.333<br>logFC = -1.9                 | FDR = 0.006<br>logFC = -0.7 | B < F: 0 %<br>B > F: 0%<br>B = F: 100%     |
|                           | Age          | FDR = 0.959<br>logFC = 0.0                   |                                             |                             |                                            |
|                           | Fertility    | FDR = 0.999<br>logFC = -0.1                  |                                             |                             |                                            |
| <i>Krueppel like</i>      | Caste        | FDR = 0.119                                  | FDR = 0.399                                 | FDR = 0.347                 | B < F: 0 %                                 |

|                            |           |                                               |                             |                              |                                            |
|----------------------------|-----------|-----------------------------------------------|-----------------------------|------------------------------|--------------------------------------------|
|                            |           | logFC = 0.2                                   | logFC = -2.2                | logFC = 0.266                | B > F: 0%                                  |
|                            | Age       | FDR = 0.901<br>logFC = -0.1                   |                             |                              | B = F: 100%                                |
|                            | Fertility | FDR = 0.999<br>logFC = -0.0                   |                             |                              |                                            |
| <i>Tyramine receptor 2</i> | Caste     | FDR = 0.305<br>logFC = 0.2                    | FDR = 0.492<br>logFC = 4.1  | FDR = 0.280<br>logFC = 3.7   | B < F: 0 %<br>B > F: 0%<br>B = F: 100%     |
|                            | Age       | FDR = 0.989<br>logFC = -0.0                   |                             |                              |                                            |
|                            | Fertility | FDR = 0.999<br>logFC = -0.1                   |                             |                              |                                            |
| <i>VgC</i>                 | Caste     | FDR = 0.718<br>logFC = -0.1                   | FDR = 0.953<br>logFC = -0.4 | FDR = 0.507<br>logFC = 0.3   | B < F: 0 %<br>B > F: 0%<br>B = F: 100%     |
|                            | Age       | FDR = 0.723<br>logFC = 0.2                    |                             |                              |                                            |
|                            | Fertility | FDR = 0.999<br>logFC = 0.2                    |                             |                              |                                            |
| <i>MVg2</i>                | Caste     | <b>FDR &lt; 0.0001</b><br><b>logFC = -4.6</b> | FDR = 0.063<br>logFC = -4.9 | FDR < 0.0001<br>logFC = -4.2 | B < F: 0 %<br>B > F: 88.8%<br>B = F: 11.2% |
|                            | Age       | FDR = 0.885<br>logFC = 0.3                    |                             |                              |                                            |
|                            | Fertility | <b>FDR &lt; 0.0001</b>                        |                             |                              |                                            |

|                  |           |                                               |                                            |                                               |                                           |
|------------------|-----------|-----------------------------------------------|--------------------------------------------|-----------------------------------------------|-------------------------------------------|
|                  |           | <b>logFC = -2.8</b>                           |                                            |                                               |                                           |
| <i>MVg3</i>      | Caste     | <b>FDR &lt; 0.0001</b><br><b>logFC = -4.9</b> | <b>FDR = 0.002</b><br><b>logFC = -12.1</b> | <b>FDR &lt; 0.0001</b><br><b>logFC = -4.5</b> | B < F: 0 %<br>B > F: 90.5%<br>B = F: 9.5% |
|                  | Age       | FDR = 0.869<br>logFC = 0.3                    |                                            |                                               |                                           |
|                  | Fertility | <b>FDR &lt; 0.0001</b><br><b>logFC = -2.7</b> |                                            |                                               |                                           |
| <i>Vg-like A</i> | Caste     | <b>FDR &lt; 0.0001</b><br><b>logFC = -3.7</b> | <b>FDR = 0.002</b><br><b>logFC = -4.5</b>  | <b>FDR = 0.002</b><br><b>logFC = -4.0</b>     | B < F: 0 %<br>B > F: 99.5%<br>B = F: 0.5% |
|                  | Age       | FDR = 0.993<br>logFC = 0.0                    |                                            |                                               |                                           |
|                  | Fertility | FDR = 0.999<br>logFC = -0.5                   |                                            |                                               |                                           |
| <i>Vg-like B</i> | Caste     | FDR = 0.233<br>logFC = -0.1                   | FDR = 0.913<br>logFC = -0.5                | FDR = 0.543<br>logFC = 0.1                    | B < F: 0 %<br>B > F: 0%<br>B = F: 100%    |
|                  | Age       | FDR = 0.536<br>logFC = -0.1                   |                                            |                                               |                                           |
|                  | Fertility | FDR = 0.999<br>logFC = -0.0                   |                                            |                                               |                                           |
| <i>Vg-like C</i> | Caste     | FDR = 0.953<br>logFC = -0.1                   | FDR = 0.630<br>logFC = 0.1                 | FDR = 0.669<br>logFC = -0.1                   | B < F: 0 %<br>B > F: 0%<br>B = F: 100%    |
|                  | Age       | FDR = 0.995<br>logFC = 0.0                    |                                            |                                               |                                           |



|                      |              |                                               |                                               |                                               |                                            |
|----------------------|--------------|-----------------------------------------------|-----------------------------------------------|-----------------------------------------------|--------------------------------------------|
|                      | Fertility    | FDR = 0.999<br>logFC = 0.1                    |                                               |                                               |                                            |
| <i>VgR</i>           | <b>Caste</b> | <b>FDR &lt; 0.0001</b><br><b>logFC = -2.2</b> | <b>FDR &lt; 0.0001</b><br><b>logFC = -9.9</b> | <b>FDR &lt; 0.0001</b><br><b>logFC = -4.0</b> | B < F: 0 %<br>B > F: 64.4%<br>B = F: 35.6% |
|                      | Age          | FDR = 0.198<br>logFC = -0.9                   |                                               |                                               |                                            |
|                      | Fertility    | <b>FDR = 0.004</b><br><b>logFC = -1.5</b>     |                                               |                                               |                                            |
| <i>ultraspiracle</i> | Caste        | FDR = 0.279<br>logFC = -0.2                   | FDR = 0.090<br>logFC = 1.2                    | FDR = 0.527<br>logFC = 0.1                    | B < F: 0 %<br>B > F: 0%<br>B = F: 100%     |
|                      | Age          | FDR = 0.776<br>logFC = 0.1                    |                                               |                                               |                                            |
|                      | Fertility    | FDR = 0.999<br>logFC = 0.0                    |                                               |                                               |                                            |

825

826

827

828

829

830
